# Supplementary material for: Mitochondrial DNA depletion, mitochondrial mutations and high TFAM expression in hepatocellular carcinoma
Source: PubMed Central journal article supplement (PMC5663603; doi:10.18632/oncotarget.21033), 2017-09-16
Supplement: oncotarget-08-84373-s001.pdf [file oncotarget-08-84373-s001.pdf]

## **Mitochondrial DNA depletion, mitochondrial mutations and high TFAM expression in hepatocellular carcinoma**

### **SUPPLEMENTARY MATERIALS**

#### **Supplementary Table 1: Information of 86 HCC subjects and TFAM expression**

See Supplementary File 1

#### **Supplementary Table 2: Summary information of substitutions in 637 mtDNA sites among 86 HCC pairs**

See Supplementary File 2

Supplementary Table 3: Overview of mtDNA variants in 86 HCC pairs

| Region/gene      | Var no.(%)   | Transitions | Transversions | del | ins | Non-syn | Syn | novel Var |
|------------------|--------------|-------------|---------------|-----|-----|---------|-----|-----------|
| Control region   | 142 (22.29%) | 112         | 16            | 6   | 8   |         |     | 6         |
| other non-coding | 9 (1.41%)    | 5           | 0             | 2   | 2   |         |     | 0         |
| 12S rRNA         | 23 (3.61%)   | 21          | 1             | 0   | 1   |         |     | 1         |
| 16S rRNA         | 25 (3.92%)   | 24          | 1             | 0   | 0   |         |     | 2         |
| tRNAs            | 35 (5.49%)   | 32          | 2             | 0   | 1   |         |     | 5         |
| MT-ND1           | 39 (6.12%)   | 37          | 2             | 0   | 0   | 14      | 25  | 2         |
| MT-ND2           | 31 (4.87%)   | 28          | 3             | 0   | 0   | 13      | 18  | 1         |
| MT-ND3           | 12 (1.88%)   | 12          | 0             | 0   | 0   | 5       | 7   | 0         |
| MT-ND4           | 42 (6.59%)   | 40          | 2             | 0   | 0   | 10      | 32  | 1         |
| MT-ND4L          | 7 (1.10%)    | 6           | 1             | 0   | 0   | 4       | 3   | 0         |
| MT-ND5           | 71 (11.15%)  | 66          | 4             | 1   | 0   | 30      | 41  | 5         |
| MT-ND6           | 13 (2.04%)   | 13          | 0             | 0   | 0   | 3       | 10  | 0         |
| MT-CO1           | 40 (6.28%)   | 38          | 2             | 0   | 0   | 10      | 30  | 2         |
| MT-CO2           | 24 (3.77%)   | 24          | 0             | 0   | 0   | 4       | 20  | 0         |
| MT-CO3           | 29 (4.55%)   | 28          | 1             | 0   | 0   | 8       | 21  | 0         |
| MT-CYB           | 59 (9.26%)   | 53          | 5             | 0   | 1   | 24      | 35  | 2         |
| MT-ATP6          | 26 (4.08%)   | 25          | 0             | 0   | 1   | 12      | 14  | 1         |
| MT-ATP8          | 10 (1.57%)   | 8           | 2             | 0   | 0   | 5       | 5   | 0         |
| Total            | 637          | 572         | 42            | 9   | 14  | 142     | 261 | 28        |

Var: variants; Syn: synonymous.

Supplementary Table 4: Novel variants in HCC pairs

| Region/<br>Gene | Position | Replace<br>ment | Codon | Amino<br>change | 17 species<br>conservation | haplotype       | T/N    | Hom/Het |
|-----------------|----------|-----------------|-------|-----------------|----------------------------|-----------------|--------|---------|
| D-loop          | 157      | T-C             |       |                 |                            | A4              | T      | Hom     |
|                 | 294-341  | 48bp-del        |       |                 |                            | F1a1c           | T      | Hom     |
|                 | 394      | C-A             |       |                 |                            | F1a1c           | T      | Hom     |
|                 | 528      | T-C             |       |                 |                            | F1a1d           | T      | Hom     |
|                 | 540      | A-C             |       |                 |                            | F1a1d           | T      | Hom     |
|                 | 568      | C-CC            |       |                 |                            | G2a2            | TN     | Hom     |
| MT-TF           | 617      | G-A             |       |                 |                            | F1a1c           | T      | Hom     |
| 12S rRNA        | 955      | A-AC            |       |                 |                            | M7c3b           | N      | Hom     |
| 16S rRNA        | 2864     | T-C             | 1194  |                 |                            | F1a1c           | TN     | Hom     |
|                 | 3222     | C-A             | 1551  |                 |                            | M7c3            | TN     | Hom     |
| MT-ND1          | 3877     | T-C             | 191   | Ala-Pro         | 17/17                      | F1a1c           | T      | Hom     |
|                 | 4153     | G-A             | 283   | Asp-Asn         | 17/17                      | A4              | TN     | Hom     |
| MT-TM           | 4468     | T-A             | 72    |                 |                            | M7b1            | TN     | Hom     |
| MT-ND2          | 4963     | G-A             | 165   | Gly-Asp         | 17/17                      | F1a1c           | T      | Hom     |
| MT-CO1          | 5942     | A-G             | 13    | Syn             | 17/17                      | F1a             | TN     | Hom     |
|                 | 6582     | G-A             | 227   | Asp-Asn         | 17/17                      | F1a1c           | T      | Hom     |
| MT-TS1          | 7509     | T-TT            | 6     |                 |                            | D5a2a           | TN     | Hom     |
| MT-ATP6         | 8628     | C-CC            | 34    | Stop-gain       | 12/17                      | D4i             | T      | Hom     |
| MT-TG           | 10041    | A-C             | 55    |                 |                            | F1a1d/A17       | TN     | Hom     |
| MT-ND4          | 11226    | G-A             | 156   | Gly-Asp         | 17/17                      | F1a1c           | T      | Hom     |
| MT-TS2          | 12214    | C-T             |       |                 |                            | M7              | TN     | Hom     |
| MT-ND5          | 13267    | G-T             | 311   | Gly-Trp         | 17/17                      | F1a1c           | T      | Hom     |
|                 | 13475    | T-Del           | 380   | Leu-Stop        | 17/17                      | A4/M7c3         | T/T    | Hom     |
|                 | 13603    | A-G             | 423   | Ser-Gly         | 17/17                      | F1a1a/F1a1c/N9a | T/TN/T | Hom     |
|                 | 13718    | G-A             | 461   | Ser-Asn         | 17/17                      | F1a1            | T      | Hom     |
|                 | 13754    | C-A             | 473   | Ser-Tyr         | 17/17                      | F8a2            | TN     | Hom     |
| MT-CYB          | 14765    | A-T             | 7     | Thr-Ser         | 8/17                       | A4/N9a1/D4i     | N/N/T  | Hom     |
|                 | 14984    | C-CA            | 80    | Stop-gain       | 15/17                      | F2a             | T      | Hom     |

T/N: T for tumor tissue, N for non-tumor tissue.

Hom/Het: Hom for homoplasmy, Het for heteroplasmy.

**Supplementary Table 5: Putative pathogenic variants identified in mtDNA protein coding region in HCC samples**

See Supplementary File 3

Supplementary Table 6: Heteroplasmic variants in HCC pairs

| Gene    | Position | Replacement | aa change | Tumor tissue |           | Non-tumor tissue |           |
|---------|----------|-------------|-----------|--------------|-----------|------------------|-----------|
|         |          |             |           | Het (No.)    | Hom (No.) | Het (No.)        | Hom (No.) |
| D-loop  | 16213    | G-A         |           | A/G (1)      | *A (3)    | 0                | A (2)     |
| D-loop  | 16261    | C-T         |           | 0            | T (6)     | C/T              | T (6)     |
|         | 16311    | T-C         |           | 0            | C (5)     | T/C              | C (5)     |
| MT-RNR2 | 1736     | A-G         |           | 0            | G (8)     | A/G              | G (6)     |
| MT-ND2  | 4883     | C-T         | Thr-Ala   | 0            | T (16)    | C/T              | T (16)    |
| MT-ND5  | 12092    | C-A         | Leu-Ile   | 0            | 0         | C/A              | 0         |
| MT-ND5  | 13676    | A-G         | Asn - Ser | A/G (1)      | 0         | 0                | 0         |

\*A (3): adenine was occurred in 3 tumor tissues.
